# Supplementary material for: Self-assembly of an imidazolium surfactant in aprotic ionic liquids. 2. More than solvents
Source: Royal Society of Chemistry journal article supplement (doi:10.1039/d1sm00039j), 2021-01-01
Supplement: d1sm00039j1.pdf [file d1sm00039j1.pdf]

**Supporting Information**  
**Self-assembly of the Imidazolium Surfactant in the Aprotic Ionic Liquids.**  
**2. More than Solvents.**

Zhuang Wenchang,<sup>a</sup> Zhao Chunhua,<sup>bc</sup> Pan Yue,<sup>a</sup> Li Qintang<sup>\*a</sup>

<sup>a</sup> School of Materials and Chemical Engineering, Xuzhou University of Technology, Xuzhou 221018, P. R. China

<sup>b</sup> State Key Lab of Offshore Oil Exploitation, Beijing 100028, P. R. China

<sup>c</sup> CNOOC Research Institute Co., Ltd., Beijing 100028, P. R. China

Corresponding authors:

Qintang Li

E-mail: liqintangwind@sina.com

ORCID: 0000-0001-6311-4281

## **<sup>1</sup>H NMR results**

C<sub>16</sub>mimBr (DMSO, 600 MHz) 0.87-0.91 (3H), 1.20-1.340 (26H), 1.96-2.00 (2H), 4.12-4.16 (3H), 4.31-4.35 (2H), 7.27-7.30 (1H), 7.37-7.43 (1H), 10.49-10.57 (1H).

## **Calculation of surface adsorption parameters**

The surface parameters, such as the effectiveness of  $\gamma$  reduction ( $\Pi_{CMC}$ ), the surface excess at the air/IL interface ( $\Gamma_{max}$ ), the minimum area per surfactant molecule adsorbed at the air/IL interface ( $A_{min}$ ) and the standard Gibbs free energy of micellization ( $\Delta G_m$ ), can be calculated according to equations (S1)-(S4) below, where  $\gamma_0$  and  $\gamma_{CMC}$  are surface tensions of the pure solvent and the solution at CMC, respectively.

$$\Pi_{CMC} = \gamma_0 - \gamma_{CMC} \quad (S1)$$

$$\Gamma_{max} = -\frac{1}{RT} \left( \frac{d\gamma}{d \ln C} \right) \quad (S2)$$

$$A_{min} = \frac{1}{N_A \Gamma_{max}} \quad (S3)$$

$$\Delta G_m = RT \ln X_{CMC} \quad (S4)$$

## **SAXS analysis of Micelles**

The SAXS curves of micelles were fitted with the SASfit software (version 0.94.7). Several models like sphere, ellipsoid and cylinder have been tried and the ellipsoid model give the best fitting results.

The scattering of ellipsoid could be expressed as,

$$I(q, a, \varepsilon) = \left( \frac{4}{3} \pi a^3 \Delta \eta \right)^2 \int_0^{\frac{\pi}{2}} K^2(q, a \sqrt{\varepsilon^2 \cos^2 \theta + \sin^2 \theta}) \sin \theta d\theta \quad (S5)$$

where  $a$  is the radius of the rotational axis,  $\varepsilon$  is ratio between radius of the semi-principle axes and equatorial axis.

The hard sphere structure factor with Percus-Yevick closure relation and decoupling approach was adopted for the interaction between micelles. The structure factor of hard sphere could expressed as,

$$S(q, R_{HS}, f_q) = \frac{1}{1 + 24 f_q \frac{G(f_q, R_{HS} q)}{R_{HS} q}} \quad (S6)$$

where  $R_{HS}$  is the hard sphere repulsive radius;  $f_p$  is the volume fraction.

A constant was added in the background. More details could be found in the manual of SASfit.

## **Calculation of the structural parameters of LLCs**

### The H<sub>1</sub> phase

The lattice parameter ( $D$ ) of the normal hexagonal liquid crystalline phase is obtained according to the equation S7.

$$D = \frac{4\pi}{\sqrt{3}q_1} \quad (\text{S7})$$

### The V<sub>1</sub> phase

The lattice parameter ( $D$ ) of the normal bicontinuous cubic liquid crystalline phase is obtained according to the equation S8.

$$D = \frac{2\pi\sqrt{h^2 + l^2 + k^2}}{q} \quad (\text{S8})$$

### The L<sub>α</sub> phase

The lattice parameter ( $D$ ) of the lamellar liquid crystalline phase is obtained according to the equation S9.

$$D = \frac{2\pi}{q_1} \quad (\text{S9})$$

### Structure parameters of the ternary system

The volume percentage ( $\Phi$ ) of each component are calculated by equation (S10-S14), where the subscript S, O, IL represent the surfactant, oil and IL respectively,  $W$  and  $\rho$  are the weight percentage and density.

$$\Phi_S = \frac{W_s/\rho_s}{W_s/\rho_s + W_o/\rho_o + W_{IL}/\rho_{IL}} \quad (\text{S10})$$

$$\Phi_O = \frac{W_o/\rho_o}{W_s/\rho_s + W_o/\rho_o + W_{IL}/\rho_{IL}} \quad (\text{S11})$$

$$\Phi_{IL} = \frac{W_{IL}/\rho_{IL}}{W_s/\rho_s + W_o/\rho_o + W_{IL}/\rho_{IL}} \quad (\text{S12})$$

The solvophobic domain thickness of the L<sub>α</sub> phase  $d_a$  and the area occupied by the surfactant molecule at the solvophilic/solvophobic interface  $S$  are expressed by equation S13&S14, where  $V_S$  is the molar volume of the surfactant.

$$d_a = D(\Phi_s + \Phi_o)/2 \quad (\text{S13})$$

$$S = \frac{V_s(\Phi_s + \Phi_o)}{d_a \Phi_s} \quad (\text{S14})$$

## Figures and Tables

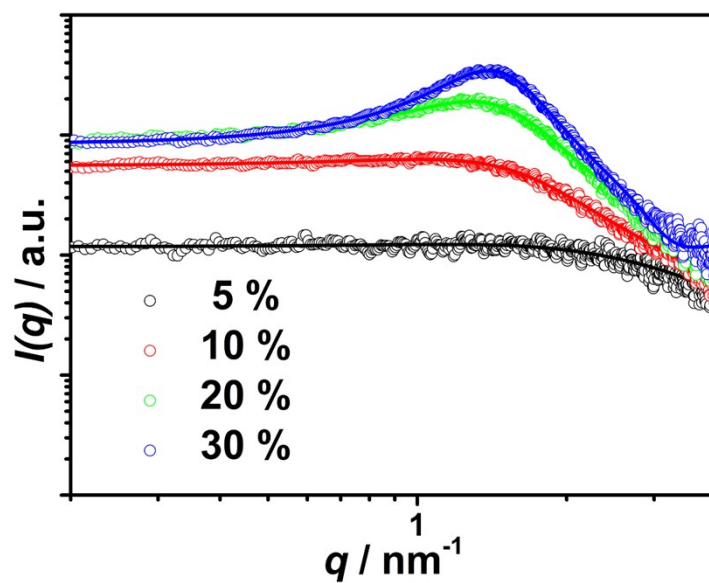

**Fig. S1** SAXS results of micelles in the  $\text{C}_{16}\text{mimBr}/[\text{Bmim}]\text{BF}_4$  system at different surfactant concentrations. Open symbols for experimental and lines for fitting curves.

**Table S1** Parameters of micelles in the  $\text{C}_{16}\text{mimBr}/[\text{Bmim}]\text{BF}_4$ .

| $C / \%$ | $a / \text{nm}$ | $b / \text{nm}$ | $\varepsilon$ | $N$ |
|----------|-----------------|-----------------|---------------|-----|
| 5        | 0.549           | 0.560           | 1.00          | -   |
| 10       | 0.893           | 2.01            | 2.25          | 15  |
| 20       | 1.10            | 1.79            | 1.63          | 20  |
| 30       | 1.18            | 1.77            | 1.50          | 23  |

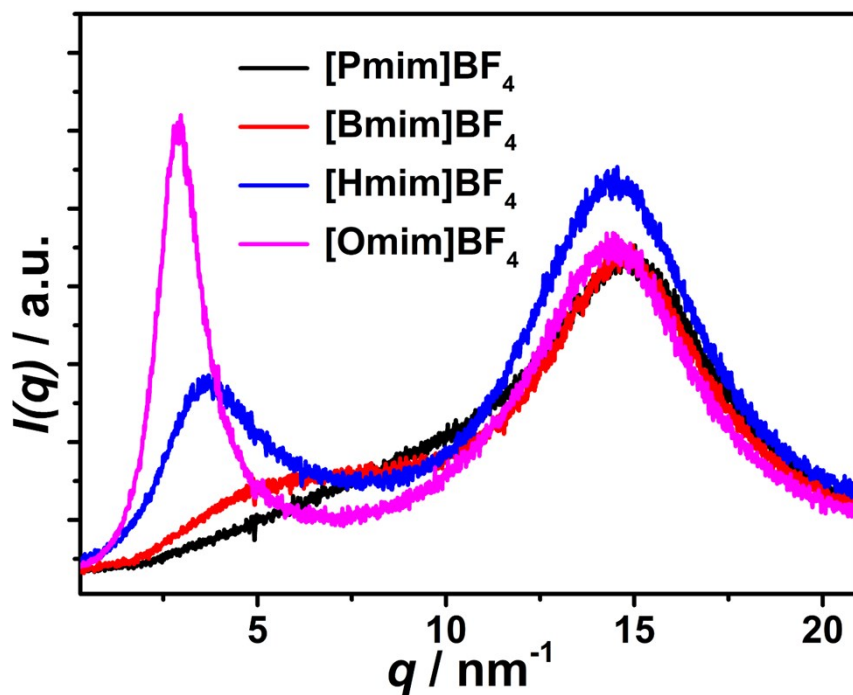

Fig. S2 SWAXS curves of APILs.

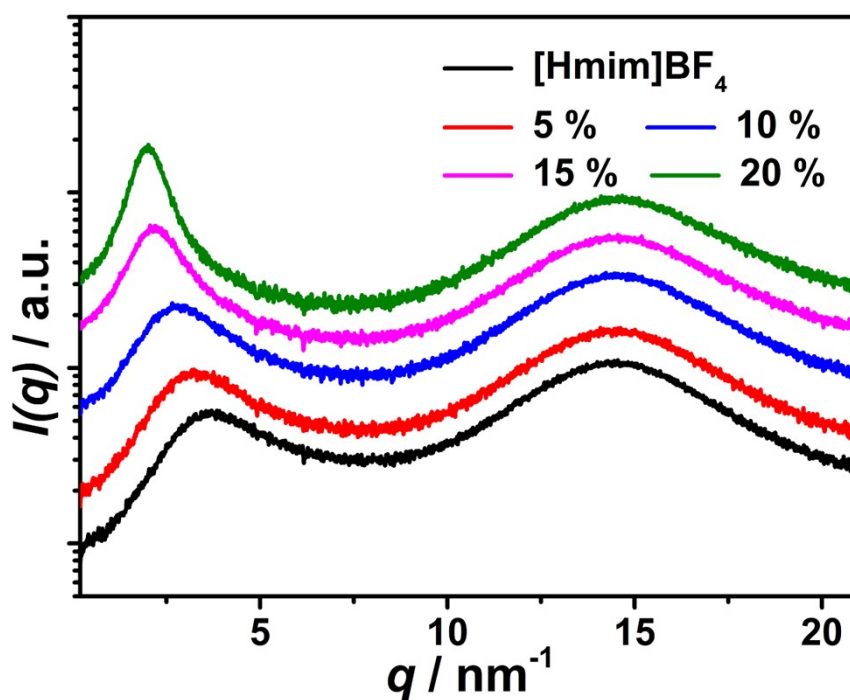

Fig. S3 SWAXS results of the  $C_{16}mimBr/[Hmim]BF_4$  solutions at different surfactant concentrations.

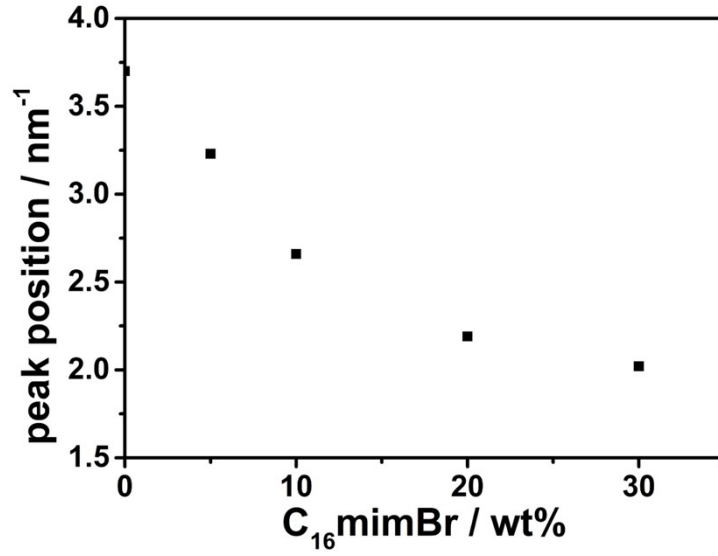

**Fig. S4** Correlation peak position of [Hmim]BF<sub>4</sub> at different surfactant concentrations.

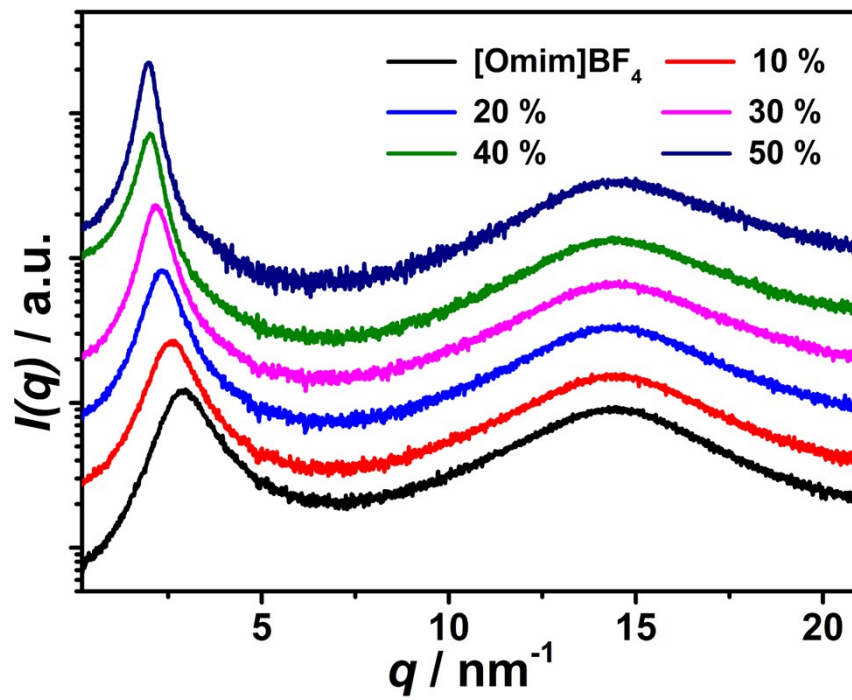

**Fig. S5** SWAXS results of the C<sub>16</sub>mimBr/[Omim]BF<sub>4</sub> solutions at different surfactant concentrations.

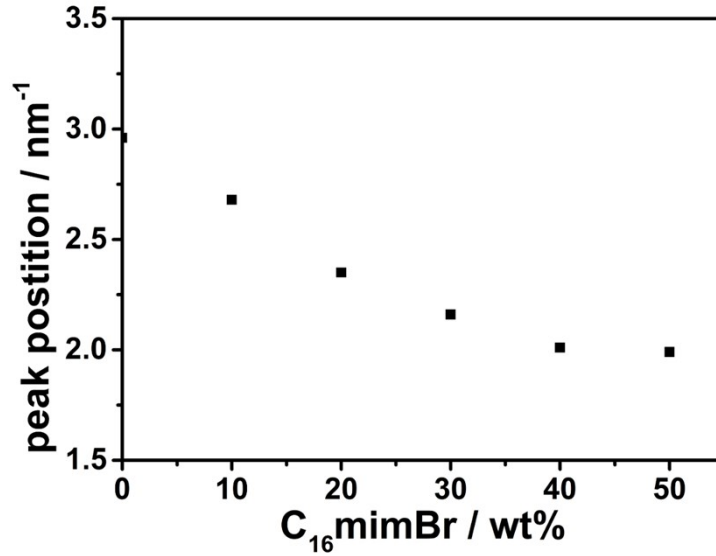

**Fig. S6** Correlation peak position of [Omim]BF<sub>4</sub> at different surfactant concentrations.

**Table S2** Gordon parameter of APILs at 25 °C.

| APIL                  | $\gamma / \text{mN}\cdot\text{m}^{-1}$ | $V_m / \text{cm}^3\cdot\text{mol}^{-1}$ | $G / \text{J}\cdot\text{m}^{-3}$ |
|-----------------------|----------------------------------------|-----------------------------------------|----------------------------------|
| [Emim]BF <sub>4</sub> | 54.1                                   | 156                                     | 1.01                             |
| [Pmim]BF <sub>4</sub> | 46.6                                   | 171                                     | 0.840                            |
| [Bmim]BF <sub>4</sub> | 44.7                                   | 188                                     | 0.780                            |
| [Hmim]BF <sub>4</sub> | 37.8                                   | 221                                     | 0.625                            |
| [Omim]BF <sub>4</sub> | 32.8                                   | 256                                     | 0.516                            |

**Table S3** Structure parameters of the LLC phases in the C<sub>16</sub>mimBr/[Emim]BF<sub>4</sub>/1-octanol system.

| Sample | $D / \text{nm}$ | $d_a / \text{nm}$ | $d_{IL} / \text{nm}$ | $S / \text{nm}^2$ |
|--------|-----------------|-------------------|----------------------|-------------------|
| b1     | 4.33            | 1.60              | 1.14                 | 0.420             |
| b2     | 4.13            | 1.65              | 0.83                 | 0.454             |
| b3     | 3.90            | 1.63              | 0.65                 | 0.489             |
| b4     | 3.55            | 1.59              | 0.37                 | 0.556             |
| c0     | 3.96            | 1.74              | 0.49                 | 0.360             |
| c1     | 3.83            | 1.74              | 0.35                 | 0.378             |
| c2     | 3.75            | 1.77              | 0.21                 | 0.394             |
| c3     | 3.73            | 1.79              | 0.15                 | 0.399             |
